# Supplementary material
Source: PubMed Central journal article supplement (PMC4599386)
Supplement: Supp_Figure1.pdf [file Supp_Figure1.pdf]

## Supplementary Data

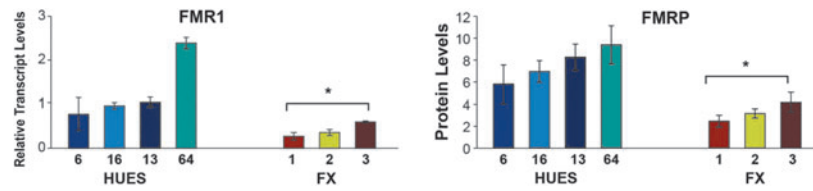

**SUPPLEMENTARY FIG. S1.** Expression of FMR1 in hNPC lines (corresponding to Fig. 3). Relative transcript levels of FMR1 (*left*) and quantified protein levels of FMRP (*right*), for all four HUES-hNPC lines and all three FX-hNPC lines. Values were normalized to GAPDH. All values are mean  $\pm$  SEM ( $n=3$ /line,  $*P < 0.05$ ; ANOVA).
