# Supplementary material
Source: PubMed Central journal article supplement (PMC4599386)
Supplement: Supp_Table1.pdf [file Supp_Table1.pdf]

SUPPLEMENTARY TABLE S1. FULL LIST OF hESC LINES USED IN THIS STUDY

| <i>hESC line</i> | <i>Original name</i> | <i>Institution</i>          | <i>Sex</i> | <i>CGG repeats</i> | <i>Sources/information</i>                                                                                                                    |
|------------------|----------------------|-----------------------------|------------|--------------------|-----------------------------------------------------------------------------------------------------------------------------------------------|
| HUES6            | HUES6                | Harvard University          | XX         | <30                | <a href="http://stemcelldistribution.harvard.edu/Telias%20et%20al.%20%5B17%5D">http://stemcelldistribution.harvard.edu/Telias et al. [17]</a> |
| HUES16           | HUES16               | Harvard University          | XY         | <30                | <a href="http://stemcelldistribution.harvard.edu/Telias%20et%20al.%20%5B17%5D">http://stemcelldistribution.harvard.edu/Telias et al. [17]</a> |
| HUES13           | HUES13               | Harvard University          | XY         | <30                | <a href="http://stemcelldistribution.harvard.edu/Telias%20et%20al.%20%5B17%5D">http://stemcelldistribution.harvard.edu/Telias et al. [17]</a> |
| HUES64           | HUES64               | Harvard University          | XY         | n/a                | <a href="http://stemcelldistribution.harvard.edu/">http://stemcelldistribution.harvard.edu/</a>                                               |
| FX1              | HEFX1                | Tel Aviv Medical Center     | XY         | 200–650            | Eiges et al. [16]; Telias et al. [17]; Avitzour et al. [62]                                                                                   |
| FX2              | SZFX6                | Shaare Zedek Medical Center | XY         | 200–330            | Telias et al. [17]; Avitzour et al. [62]                                                                                                      |
| FX3              | Lis_FX6              | Tel Aviv Medical Center     | XY         | 50–300             | Telias et al. [17]; Avitzour et al. [62]                                                                                                      |

List of all hESC lines used, ordered according to the labels given by us in this study, as well as the original name of the line, its parent institution, its sex, the number of CGG repeats at the FMR1 locus, and references for further information.  
hESCs, human embryonic stem cells.
