# Supplementary material
Source: PubMed Central journal article supplement (PMC4599386)
Supplement: Supp_Table2.pdf [file Supp_Table2.pdf]

SUPPLEMENTARY TABLE S2. PRIMERS (OLIGOS) USED FOR QUANTITATIVE REAL-TIME PCR ASSAY AND SEQUENCES OF siRNA CONSTRUCTS

| <i>Gene</i>                           | <i>Reverse</i>             | <i>Forward</i>            |
|---------------------------------------|----------------------------|---------------------------|
| <i>GAPDH</i>                          | atagcacaatccgttgact        | agccacatcgtcagacacc       |
| <i>FMR1</i>                           | aatagcagtgaccccaggt        | cacctcaaagcggacacat       |
| <i>OCT4</i>                           | gatttcattgtgtcagctcc       | gggttctattgggaagg         |
| <i>NANOG</i>                          | ttctgtttctgaccgggacctt     | ttcctcctccatggatctgctt    |
| <i>SOX1</i>                           | caaggcatttgcgttcacatc      | tctgggaaaacgggcaaaata     |
| <i>SOX2</i>                           | gaggaagaggtaccacaggg       | acagcatgtcctactcgcagt     |
| <i>SOX3</i>                           | ttcacacggctcctggtctg       | gaggcgcaggcaagagtagt      |
| <i>SOX4</i>                           | cgttgccggacttcacctt        | agcgacaagatcccttccattc    |
| <i>SOX9</i>                           | tagcctccctcactccaaga       | agaccttgggctgccttat       |
| <i>SOX11</i>                          | cgaatccaatccttatccacca     | cgccgacgacctgatgttc       |
| <i>SOX21</i>                          | atctctgccattttggagccc      | gctcgccaatcccgagaag       |
| <i>MAP2</i>                           | cattggcgccttcggacaag       | ctcagcaccgctaacagagg      |
| <i>GFAP</i>                           | aggtccatgtggagcttgac       | gccattgcctcactactcgt      |
| <i>TUJ1</i>                           | ttttgtctgctcaaggtatgt      | gggagcattccaacctt         |
| <i>TAU</i>                            | tgccatgttgagcaggacta       | tcactttacagcaacagtcagt    |
| <i>NUEROD1</i>                        | ctcgtcctgagaactgagaca      | accaaatcgtacagcgagagt     |
| <i>NEUROGENIN1</i>                    | gcgttgtgtggagcaagtc        | gctctctgaccccgtagc        |
| <i>GSK3<math>\beta</math></i>         | ccgatggcagattccaagg        | agacgcctcctgtgatttatgt    |
| <i><math>\beta</math>-CATENIN</i>     | tggctcctcgtcatttagcagtt    | atgtccagcgttggctgaa       |
| <i><math>\alpha</math>-FMR1 siRNA</i> | uggagaggaucaaggagcagugaaa  | uuucacugcauccugauccucucca |
| <i><math>\alpha</math>-SOX2 siRNA</i> | gcgugaaccagcgcgauggacaguuu | uaacuguccaugcgcugguucacgc |

Sequences of all primers (oligo-DNAs) used for quantitative real-time PCR assays (Sigma) and sequences for custom-designed siRNA used to silence FMR1 and SOX2 (Life Tech.). Stealth RNAi siRNA Negative Control Med GC Duplex (Life Tech.) was used as negative control for siRNA knockdown assays.

PCR, polymerase chain reaction.
