# Supplementary material
Source: PubMed Central journal article supplement (PMC4599386)
Supplement: Supp_Table3.pdf [file Supp_Table3.pdf]

SUPPLEMENTARY TABLE S3. PRIMARY ANTIBODIES  
USED IN IMMUNOSTAINING ASSAYS

| <i>Target</i> | <i>Host</i> | <i>Provider and Cat. No.</i> |
|---------------|-------------|------------------------------|
| FMRP          | Mouse       | Millipore—MAB2160            |
| FMRP          | Rabbit      | Abcam—ab17722                |
| N-Cadherin    | Rabbit      | Santa Cruz—sc-7939           |
| SOX1          | Rabbit      | Millipore—AB5768             |
| SOX1          | Rabbit      | Abnova—PAB2606               |
| SOX3          | Mouse       | R&D—MAB2569                  |
| ZO-1          | Rabbit      | Abcam—ab59720                |
| GFAP          | Mouse       | Millipore—MAB360             |
| b-Tubulin     | Rabbit      | Abcam—ab134185               |
| PAX6          | Rabbit      | Santa Cruz—sc-11357          |
| MAP2          | Rabbit      | Santa Cruz—sc-20172          |
| MAP2          | Mouse       | Abcam—ab3096                 |
| Doublecortin  | Mouse       | Santa Cruz—sc-271390         |
| NeuN          | Mouse       | GeneTex—GTX30773             |
| Tuj1          | Mouse       | Millipore—MAB1195            |
| CamKII        | Rabbit      | Santa Cruz—sc-13082          |

Full list of primary antibodies used in semiquantitative immunostaining assays. Primary antibodies were detected using Cy2-conjugated sheep anti-mouse or Cy3-conjugated goat anti-rabbit secondary antibodies (Jackson Labs). Working concentrations of primary and secondary antibodies were as recommended by the manufacturer.
