# Supplementary material
Source: PubMed Central journal article supplement (PMC4599386)
Supplement: Supp_Table4.pdf [file Supp_Table4.pdf]

SUPPLEMENTARY TABLE S4. ANTIBODIES USED  
FOR WESTERN BLOT ANALYSIS

| <i>Target</i>           | <i>Host</i> | <i>Provider and Cat. No.</i> |
|-------------------------|-------------|------------------------------|
| FMRP                    | Rabbit      | Abcam—ab17722                |
| GSK3 $\beta$            | Mouse       | Abcam—ab31826                |
| Total $\beta$ -catenin  | Rabbit      | Santa Cruz—sc7199            |
| Active $\beta$ -catenin | Mouse       | Millipore—05-665             |
| SOX9                    | Rabbit      | Abcam—ab5535                 |
| $\beta$ -Actin          | Mouse       | Abcam—ab8224                 |

Full list of primary antibodies used in analysis of protein expression by western blot. Primary antibodies were detected using HRP-conjugated goat anti-mouse or HRP-conjugated goat anti-rabbit secondary antibodies (Jackson Labs). Working concentrations of primary and secondary antibodies were as recommended by the manufacturer.
